# Supplementary material for: Inhibitory effects of class I antiarrhythmic agents on Na+ and Ca2+ currents of human iPS cell-derived cardiomyocytes
Source: PubMed Central journal article supplement — Regen Ther. 2019 Feb 1;10:104–11. doi: 10.1016/j.reth.2018.12.002 (PMC6360514; doi:10.1016/j.reth.2018.12.002), 2019-02-01
Supplement: mmc1.pdf [file mmc1.pdf]

# Supplemental Figure S1

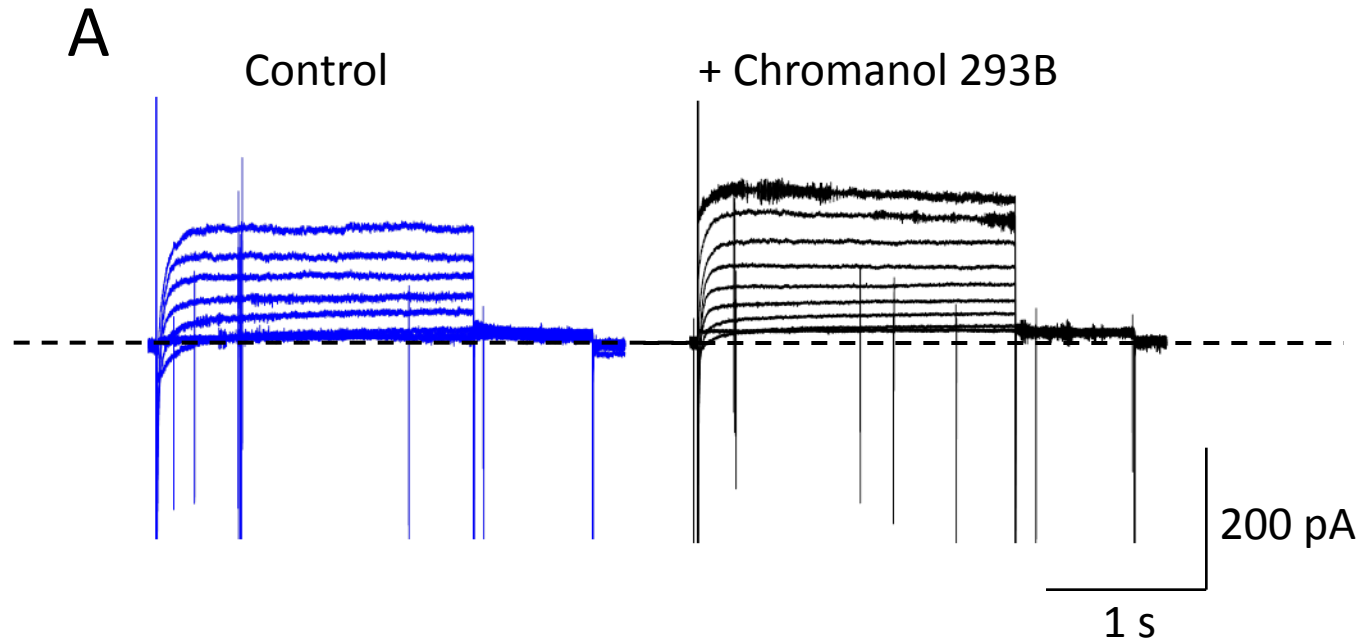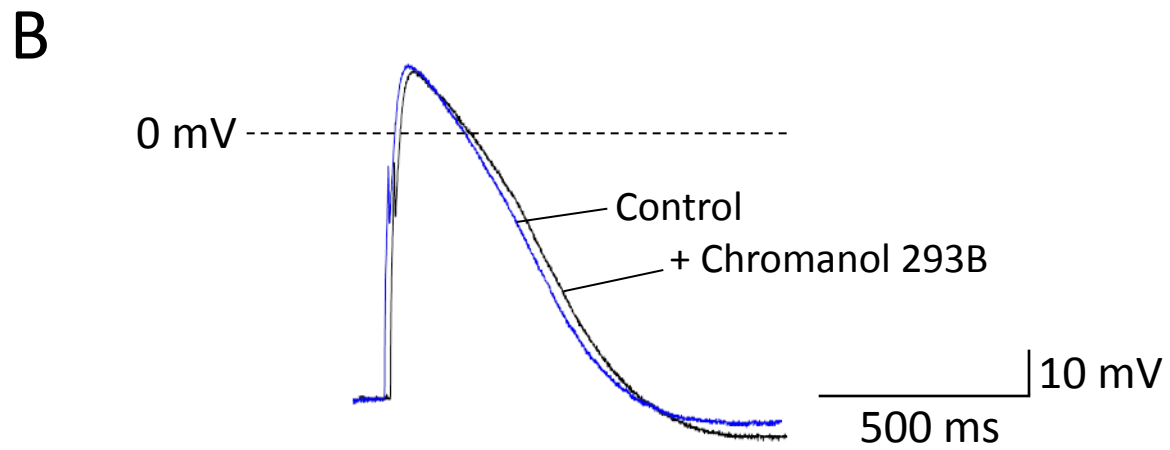

# Supplemental Figure S2

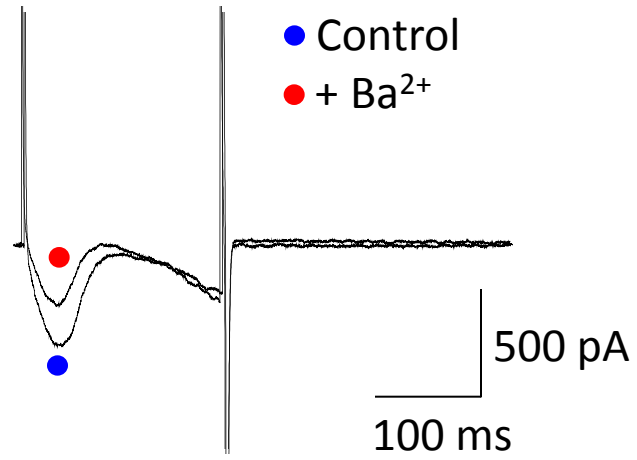

## Legends for Supplemental Figures

**Supplemental Figure S1:** Effects of the specific  $I_{Ks}$  blocker chromanol 293B on sarcolemmal ionic currents and APs.

**A:** Effects on sarcolemmal ionic currents. Currents were recorded during 2-s step depolarizations from the HP of  $-50$  mV and subsequent repolarizations to the HP in the absence and presence of the agent at  $3$   $\mu$ M.

**B:** Effects on APs. APs were elicited every 3 s by 5-ms square current pulses of 1 nA, and were recorded at 20 kHz in the absence (blue) and presence (black) of the agent at  $3$   $\mu$ M.

**Supplemental Figure S2:** Effects of the  $I_{K1}$  blocker  $Ba^{2+}$  on membrane currents during ramp pulses from  $-120$  to  $0$  mV with a HP of  $-40$  mV.  $Ba^{2+}$ -sensitive  $I_{K1}$  was detected as a difference between the currents recorded in the absence and presence of  $3$  mM  $Ba^{2+}$ .
